# Supplementary material for: Evolutionary rate covariation analysis of E-cadherin identifies Raskol as a regulator of cell adhesion and actin dynamics in Drosophila
Source: PubMed Central journal article supplement (PMC6375579; doi:10.1371/journal.pgen.1007720), 2019-02-14

S4 Fig

A

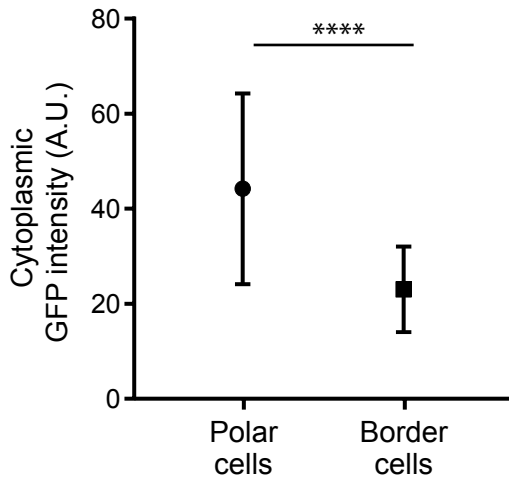

B

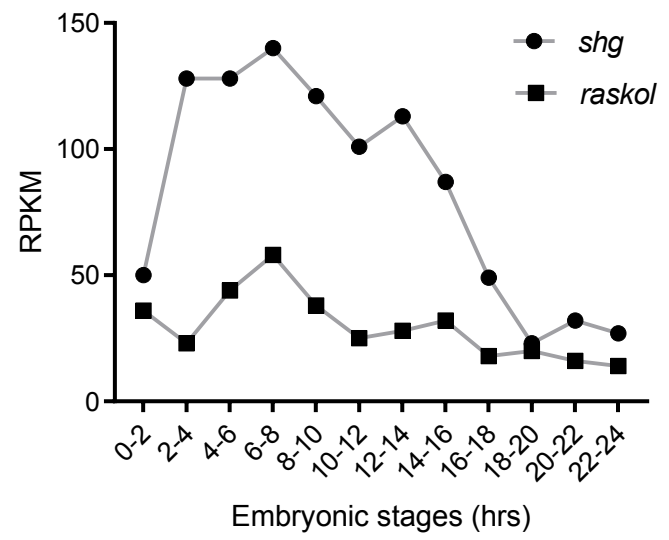

Supplement: pgen.1007720.s004.pdf [file pgen.1007720.s004.pdf]
